# Supplementary material for: Fenton-like ionic liquids/H2O2system: one-pot extraction combined with oxidation desulfurization of fuel
Source: Royal Society of Chemistry journal article supplement (doi:10.1039/c1ra00163a), 2011-11-17
Supplement: c1ra00163a.pdf [file c1ra00163a.pdf]

## **Fenton-like Ionic Liquids/H<sub>2</sub>O<sub>2</sub> System: One-pot Extraction Combined with Oxidation Desulfurization of Fuel**

*Wenshuai Zhu, Jingtong Zhang, Huaming Li\*, Yanhong Chao, Wei Jiang, Sheng Yin,*

*Hui Liu*

*College of Chemistry and Chemical Engineering, Jiangsu University, 301 Xuefu Road,*

*Zhenjiang 212013, P. R. China*

*\*Corresponding author: Tel: 86-0511-88791800, Fax: 86-0511-88791708, E-mail:*

*lihm@ujs.edu.cn*

## The results of IR and Raman data of ionic liquids

### **[Et<sub>3</sub>NHCl]FeCl<sub>3</sub>:**

IR (KBr disc; cm<sup>-1</sup>): 3503[ν(N-H)], 3001, 2939, 2880[ν(C-H)], 1471, 1400[δ(-CH<sub>3</sub>)], 1174, 1036[δ(-CH<sub>2</sub>-)], Raman (cm<sup>-1</sup>): 333;

### **[Et<sub>3</sub>NHCl]CuCl<sub>2</sub>:**

IR (KBr disc; cm<sup>-1</sup>): 3491[ν(N-H)], 2989, 2939, 2879[ν(C-H)], 1471, 1393[δ(-CH<sub>3</sub>)], 1173, 1036[δ(-CH<sub>2</sub>-)], Raman (cm<sup>-1</sup>): 235;

### **[Et<sub>3</sub>NHCl]ZnCl<sub>2</sub>:**

IR (KBr disc; cm<sup>-1</sup>): 3430[ν(N-H)], 2993, 2939, 2873[ν(C-H)], 1472, 1398[δ(-CH<sub>3</sub>)], 1172, 1037[δ(-CH<sub>2</sub>-)], Raman (cm<sup>-1</sup>): 286;

### **[Et<sub>3</sub>NHCl]CoCl<sub>2</sub>:**

IR (KBr disc; cm<sup>-1</sup>): 3432[ν(N-H)], 2997, 2940, 2880[ν(C-H)], 1464, 1400[δ(-CH<sub>3</sub>)], 1174, 1036[δ(-CH<sub>2</sub>-)], Raman (cm<sup>-1</sup>): 266, 277;

### **[Et<sub>3</sub>NHCl]SnCl<sub>2</sub>:**

IR (KBr disc; cm<sup>-1</sup>): 3445[ν(N-H)], 2981, 2939, 2880[ν(C-H)], 1463, 1393[δ(-CH<sub>3</sub>)], 1173, 1037[δ(-CH<sub>2</sub>-)], Raman (cm<sup>-1</sup>): 256, 295;

### **[Et<sub>3</sub>NHCl]CrCl<sub>3</sub>:**

IR (KBr disc; cm<sup>-1</sup>): 3432[ν(N-H)], 2984, 2937, 2879[ν(C-H)], 1470, 1394[δ(-CH<sub>3</sub>)], 1174, 1036[δ(-CH<sub>2</sub>-)], Raman (cm<sup>-1</sup>): 254, 326.
